# Supplementary material
Source: PubMed Central journal article supplement (PMC7895998)
Supplement: mmc1.pdf [file mmc1.pdf]

**Biophysical Journal, Volume 120**

**Supplemental Information**

**Frustration and Direct-Coupling Analyses to Predict Formation and  
Function of Adeno-Associated Virus**

**Nicole N. Thadani, Qin Zhou, Kiara Reyes Gamas, Susan Butler, Carlos Bueno, Nicholas P. Schafer, Faruck Morcos, Peter G. Wolynes, and Junghae Suh**

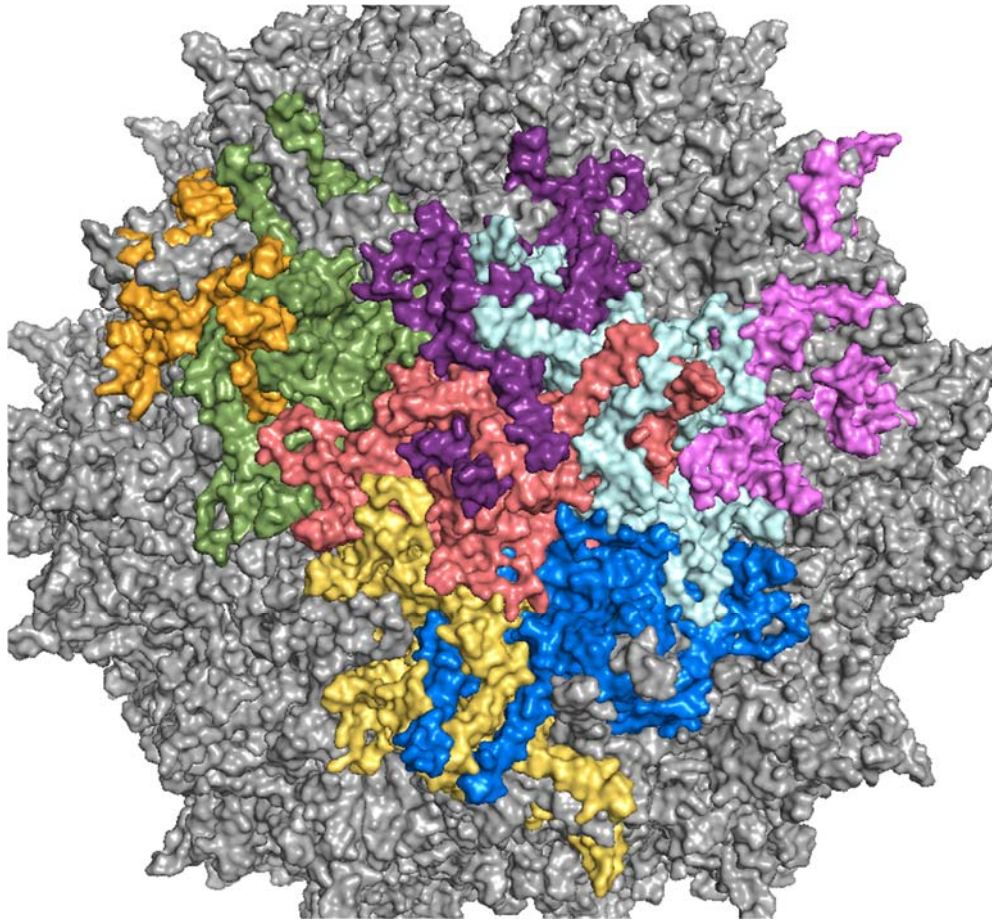

**Figure S1: AAV2 monomer and multimer substructures (related to Fig. 1).** The AAV2 monomer (coral) is defined as one VP3 subunit. The AAV2 multimer is defined as the central monomer (coral) and the seven surrounding monomers containing a residue with any atom within a radius of 4.5Å around any of the central monomer residues. The rest of the AAV capsid (grey) was not included in this analysis.

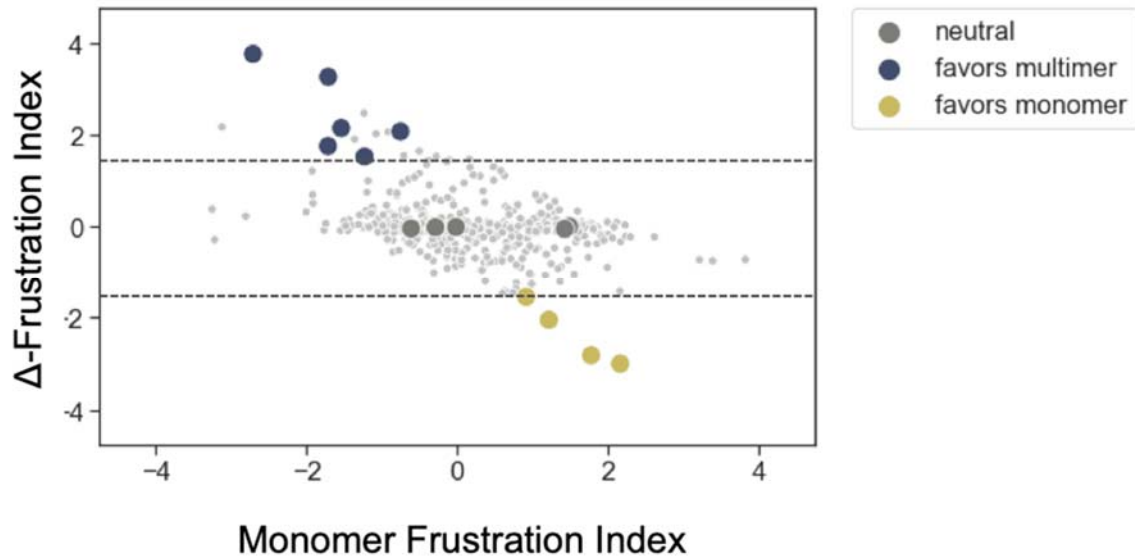

**Figure S2: AAV2  $\Delta$ -frustration index plotted against the monomer frustration index (related to Fig. 2).** The AAV2  $\Delta$ -frustration index is computed as the difference between the single-residue mutational frustration index of the multimer and the single-residue mutational frustration index of the monomer. Residues with a positive  $\Delta$ -frustration index are predicted to energetically favor the assembly state, while residues with a negative  $\Delta$ -frustration index are predicted to favor the monomer. Residues selected for mutation are large colored circles. Residues not selected for mutation are small grey dots. Dashed lines indicate the  $\pm 1.5$   $\Delta$ -frustration index thresholds used to select residues for mutation.

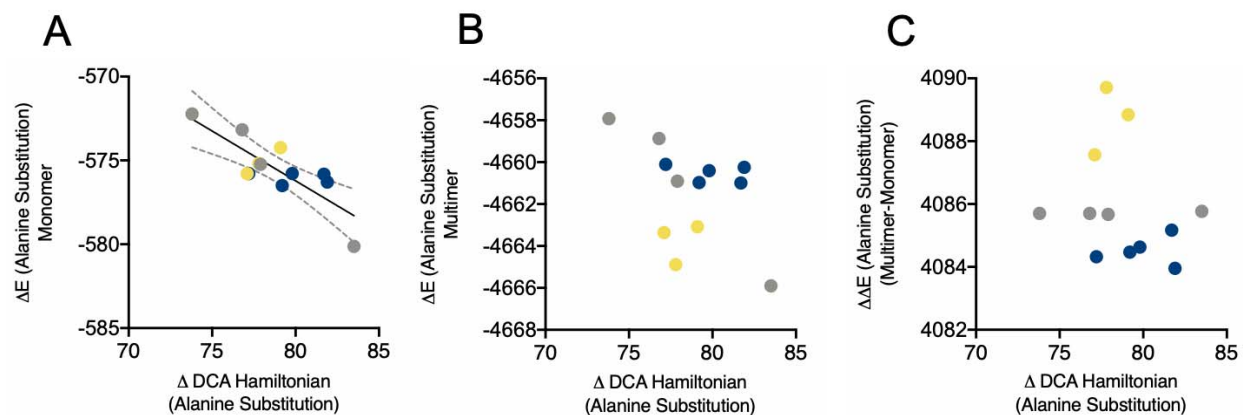

**Figure S3: AAV2  $\Delta H_{DCA(Ala)}$  plotted against  $\Delta E$ -monomer,  $\Delta E$ -multimer, and  $\Delta\Delta E$  of alanine substitutions (related to Fig. 3). AAV2  $\Delta H_{DCA(Ala)}$  is plotted against  $\Delta E$ -monomer (A),  $\Delta E$ -multimer (B), and  $\Delta\Delta E$  (C). N=12. R471A, F712A, and S721A were excluded from these analyses due to a high gap frequency at their alignment position. Regression lines with 95% confidence interval are plotted for statistically significant correlations.**

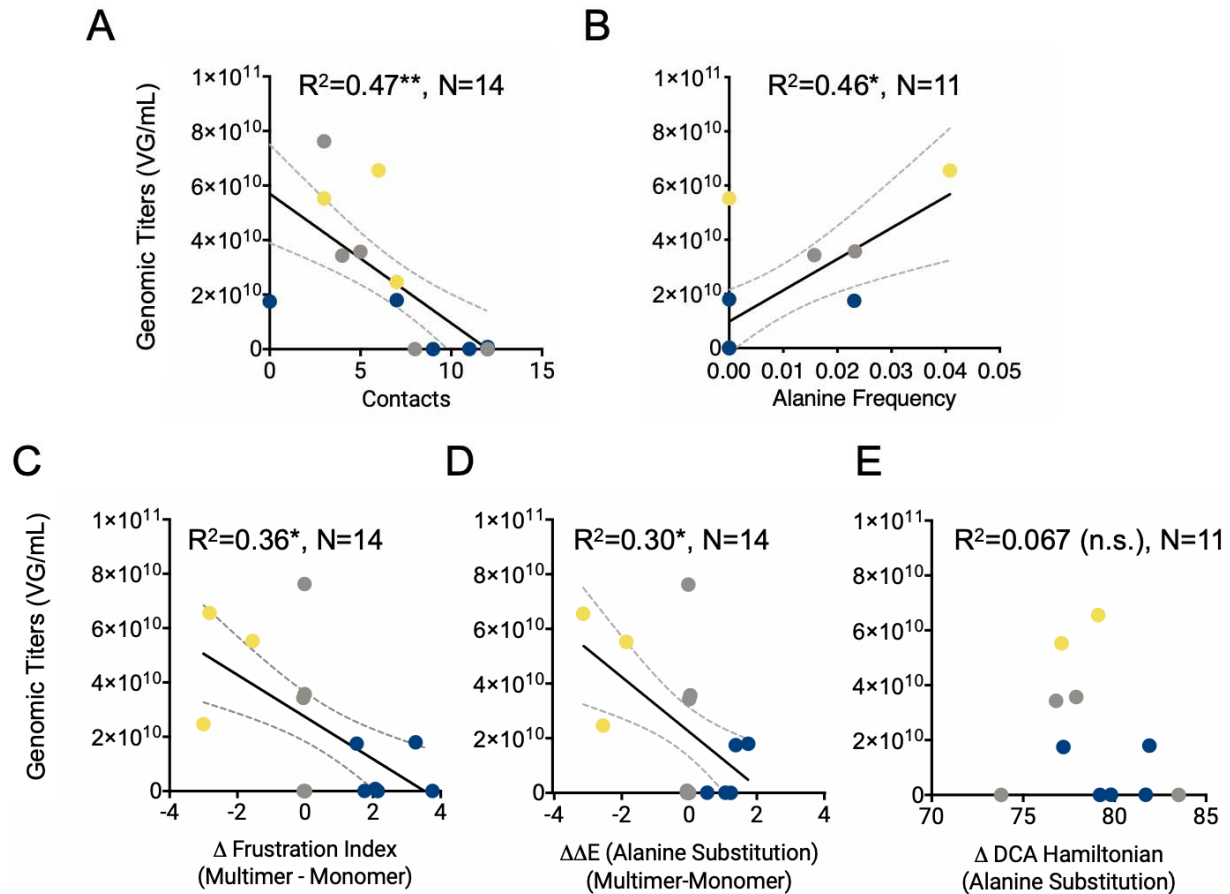

**Figure S4: Correlation of AAV2 genomic titers with computational metrics excluding the P657A mutant (related to Fig. 5).** Genomic titers are plotted against (A) number of residue-residue contacts in the native capsid structure, (B) alanine frequency in the parvovirus sequence family, (C)  $\Delta$ -frustration index, (D)  $\Delta\Delta E$  of alanine substitutions, and (E)  $\Delta H_{DCA(Ala)}$ . N=14 mutants excluding P657A for structure-based analyses. N=11 mutants excluding P657A for sequence-based analyses as R471A, F712A, and S721A were excluded from these analyses due to a high gap frequency at their alignment position. Regression lines with 95% confidence interval are plotted for statistically significant correlations.  $R^2$  values and significance levels are reported (\* $p < 0.05$ , \*\* $p < 0.01$ ).

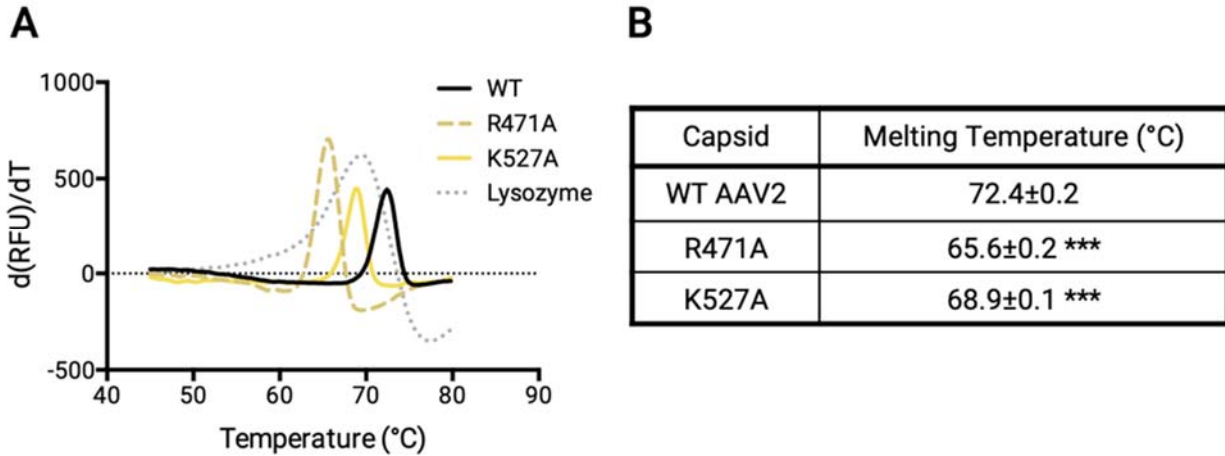

**Figure S5: Melting temperature of alanine mutant capsids R471A and K527A (related to Fig. 6).** The melting temperatures of selected capsids with reductions in thermal stability were determined using differential scanning fluorescence. **(A)** Derivative in fluorescence intensity with heating of capsids. Fluorescence increases upon the binding of Sypro Orange to exposed hydrophobic pockets as capsids denature. Traces are the average of N=3 independent experiments. Lysozyme is included as a control, which denatures at 69.4°C±0.2, comparable to the previously reported melting temperature of 68.6°C (1). **(B)** Melting temperature of capsids were determined as the peak of plots shown in panel A. N=3 independent experiments in duplicate, SEM reported. One-way ANOVA was performed with Dunnett's post-hoc multiple comparison test to compare melting temperatures of mutants to WT. \*\*\*p<0.001

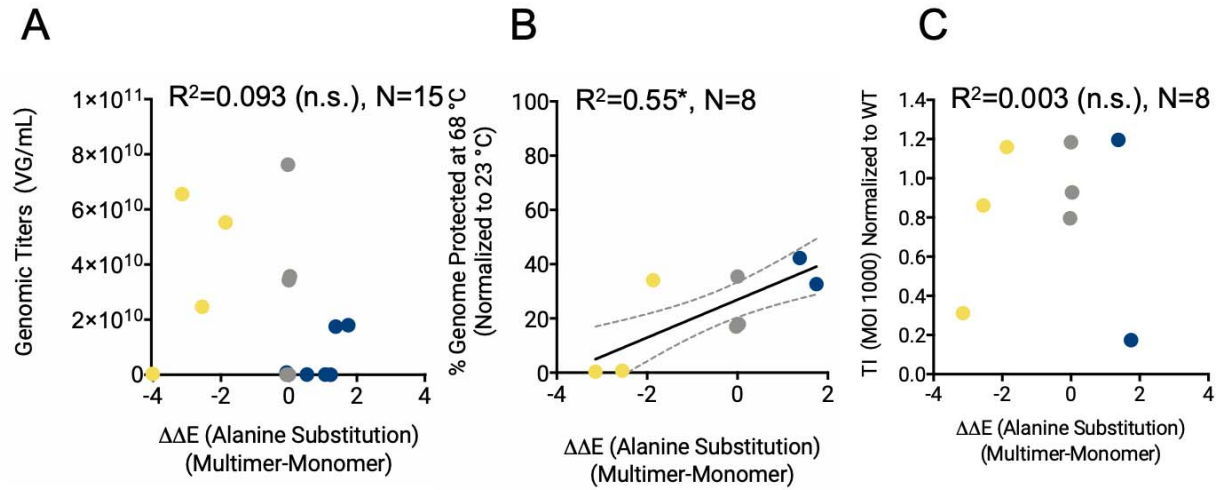

**Figure S6 (related to Fig. 5-7): Correlation of  $\Delta\Delta E$  of alanine substitutions with experimental measures:**  $\Delta\Delta E$  of alanine substitutions are plotted against **(A)** genomic titers, **(B)** % genomic protection at 68 °C, and **(C)** transduction index. Regression lines with 95% confidence interval are plotted for statistically significant correlations.  $R^2$  values and significance levels are reported (\* $p<0.05$ ).

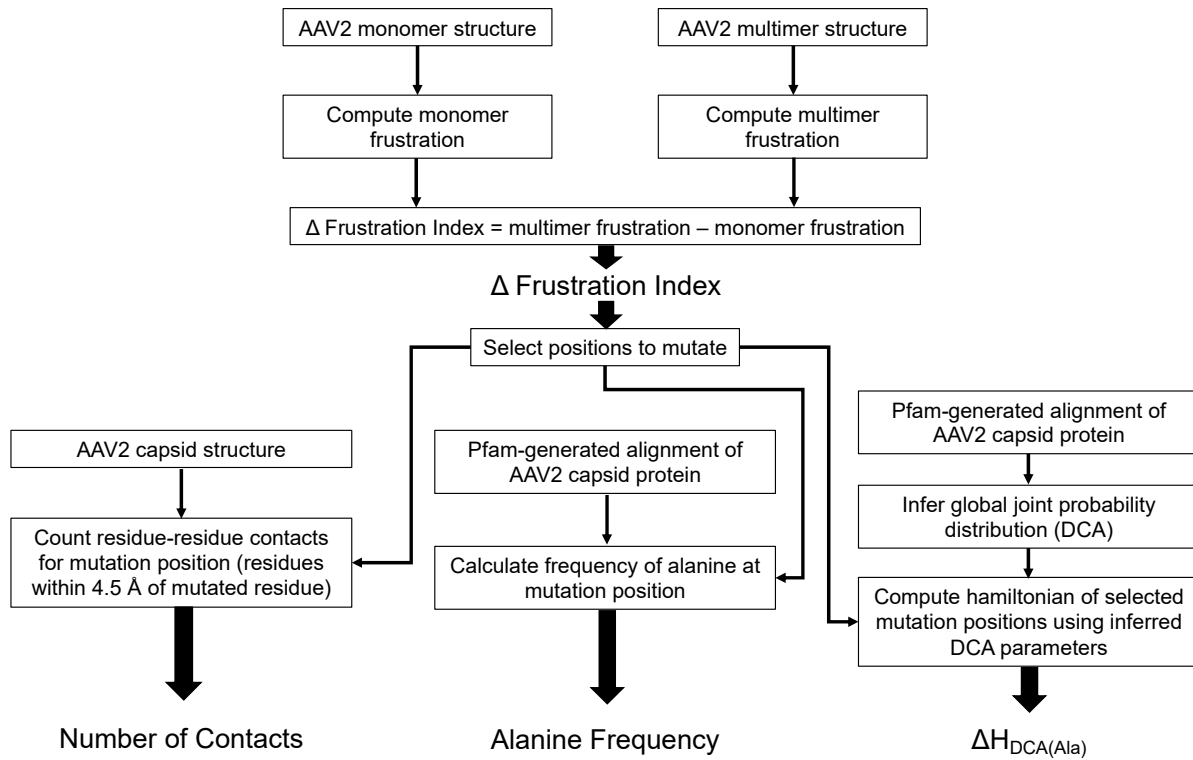

**Figure S7: Overview of computational methods and their application in this study.**



**Supporting Data File 1 (related to methods):** Hidden markov model used to find sequences in the parvovirus sequence family (Text file)

**Supporting Data File 2 (related to methods):** Multiple sequence alignment generated by using HMM to query for sequences in the parvovirus sequence family (Text file)

**Supporting Data File 3 (related to methods):** Raw qPCR fluorescence curves and plate layouts (Excel files)

**Supporting Data File 4 (related to methods):** Flow cytometry counts and thresholds (CSV files)

**Table S1 (related to Fig. 3):** List of top 300 couplings found using DCA and their direct information scores. (Excel file)

**Table S2 (related to Fig. 5-7):** R-squared values of linear regression between structure-based variables and experimental measures excluding residues that were excluded for sequence-based measures (R471A, F712A, and S721A).

|                                           | <b>Titers</b>        | <b>Genomic Protection</b> | <b>Transduction</b>   |
|-------------------------------------------|----------------------|---------------------------|-----------------------|
| Structural Contacts<br>(distance < 4.5 Å) | 0.28 ( <i>n.s.</i> ) | 0.36 ( <i>n.s.</i> )      | 0.66*                 |
| $\Delta\Delta E$                          | 0.17 ( <i>n.s.</i> ) | 0.49 ( <i>n.s.</i> )      | 0.007 ( <i>n.s.</i> ) |
| $\Delta F$                                | 0.31 ( <i>n.s.</i> ) | 0.40 ( <i>n.s.</i> )      | 0.017 ( <i>n.s.</i> ) |

**Table S3 (related to Fig. 5):** Mutations introduced in the AAV assembly-activating protein and x-genes in alternate reading frames on the *cap* gene.

| <b>Cap gene mutation</b> | <b>AAP gene mutations</b> | <b>X gene mutations</b> |
|--------------------------|---------------------------|-------------------------|
| W228A                    | I52M, G53R                | N/A                     |
| R238A                    | E63Q                      | N/A                     |
| R245A                    | E70Q                      | N/A                     |
| E347A                    | S172R                     | N/A                     |
| Y397A                    | N/A                       | N/A                     |
| Y441A                    | N/A                       | N/A                     |
| R471A                    | N/A                       | N/A                     |
| K527A                    | N/A                       | N/A                     |
| V611A                    | N/A                       | C36R                    |
| L647A                    | N/A                       | F71L, S72P              |
| N656A                    | N/A                       | I81L                    |
| P657A                    | N/A                       | I81M                    |
| W694A                    | N/A                       | G119R                   |
| F712A                    | N/A                       | N/A                     |
| S721A                    | N/A                       | I145M                   |

## Supporting References

1. Wright, T.A., J.M. Stewart, R.C. Page, and D. Konkolewicz. 2017. Extraction of Thermodynamic Parameters of Protein Unfolding Using Parallelized Differential Scanning Fluorimetry. *J. Phys. Chem. Lett.* 8:553–558.
